# Supplementary material for: 1D chains of Mn6 single-molecule magnets
Source: Royal Society of Chemistry journal article supplement (doi:10.1039/b900743a), 2009-01-01
Supplement: b900743a.pdf [file b900743a.pdf]

## Electronic Supplementary Information

### 1D Chains from Mn<sub>6</sub> Single-Molecule Magnet Building Blocks

Leigh F. Jones,<sup>a</sup> Allesandro Prescimone,<sup>a</sup> Marco Evangelisti,<sup>\*b</sup> and Euan K. Brechin<sup>\*a</sup>

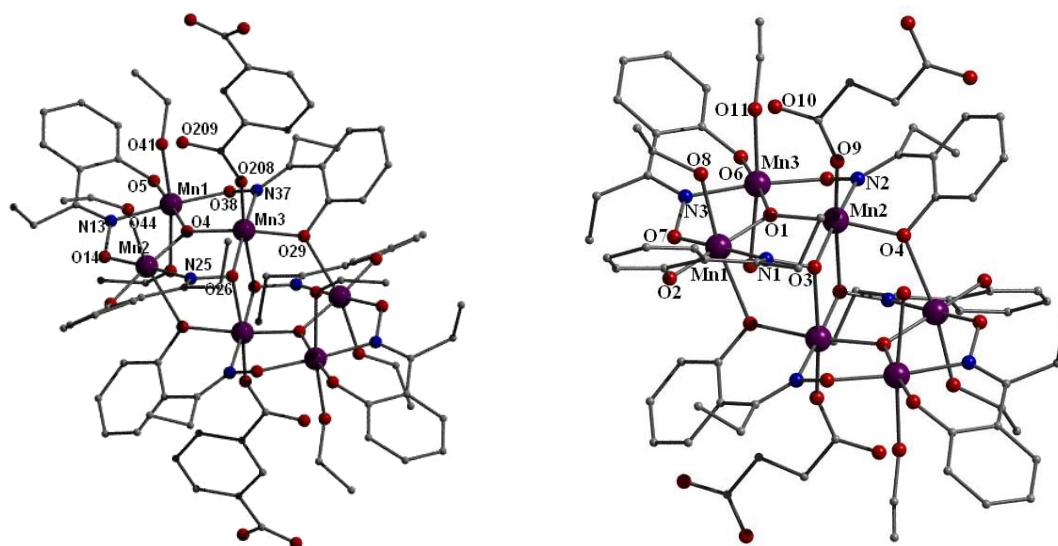

**Figure SI1** Structures of the hexametallic building blocks in **1** (left) and **2** (right). H-atoms have been omitted for clarity.

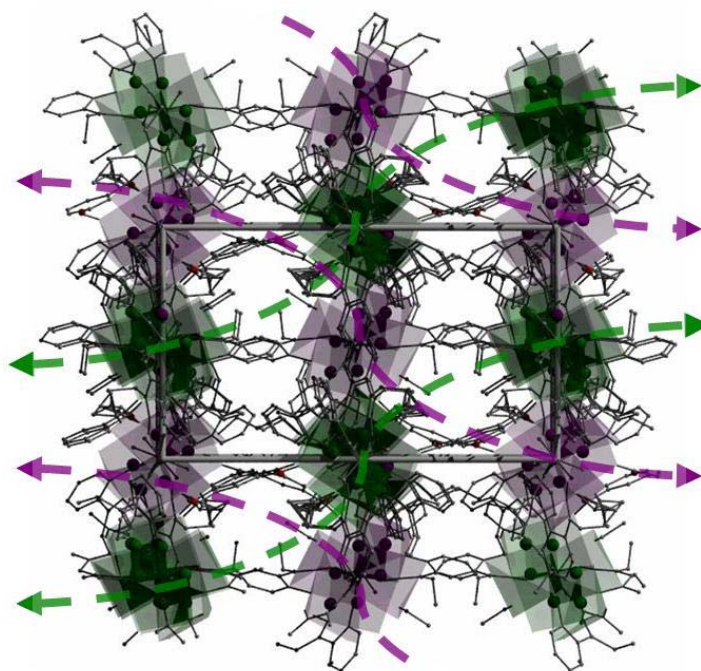

**Figure SI2.** Polyhedral representation of the packing of **1** in the crystal, viewed down the *ac* plane.

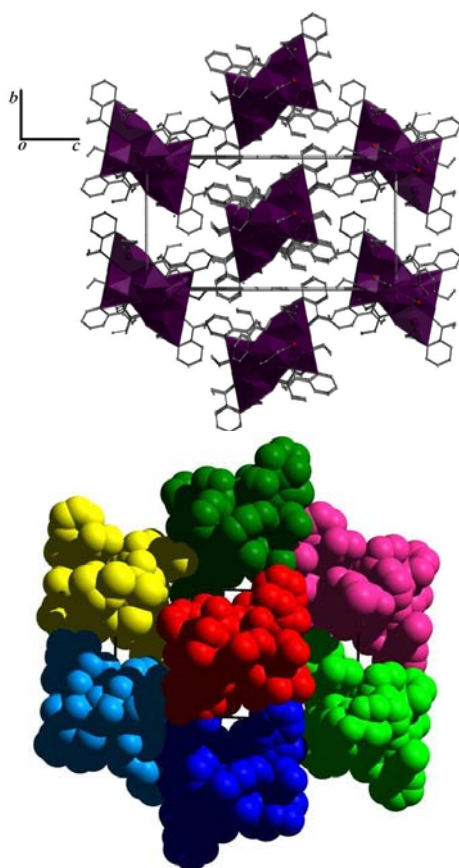

**Figure SI3** (top) A Polyhedral representation of the packing observed in the crystal structure of **2** (H atoms have been omitted for clarity). The 1D chains comprising [Mn<sub>6</sub>] units propagate out of the page (along the *a* axis). (bottom) A space-fill representation also viewed along the *a* axis with each colour representing a different 1D chain.

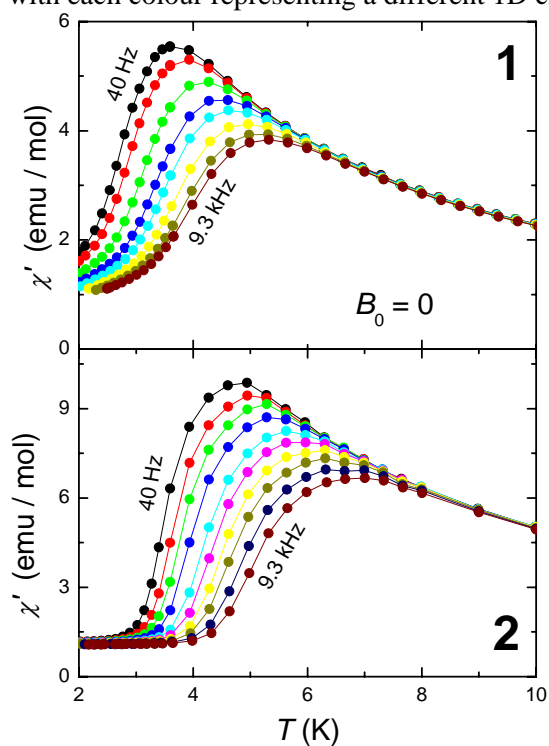

**SI4** Plots of temperature-dependencies of the in-phase  $\chi'$  susceptibility for **1** (top) and **2** (bottom) for frequencies ranging from 40 to 9300 Hz.

### Experimental Procedures

**(1):**  $\text{Mn}(\text{ClO}_4)_2 \cdot 6\text{H}_2\text{O}$  (0.25 g, 0.7 mmol), Et-saoH<sub>2</sub> (0.13 g, 0.7 mmol) and disodium isophthalate (0.15 g, 0.7 mmol) were dissolved in EtOH and added to this clear solution was 2 ml of a  $\text{NEt}_4(\text{OH})$  solution (1 M in water) which resulted in the solution turning a dark red / black colour. The solution was stirred for 1 h and upon filtration and slow evaporation black crystals of **1** were obtained in 35 % yield after 4 days.

**(2):**  $\text{Mn}(\text{ClO}_4)_2 \cdot 6\text{H}_2\text{O}$  (0.7 mmol), Et-saoH<sub>2</sub> (0.7 mmol) and disodium succinate (0.7 mmol) were dissolved in EtOH and added to this clear solution was 2 ml of a  $\text{NEt}_4(\text{OH})$  solution (1 M in water) which resulted in the solution turning a dark red / black colour. The solution was stirred for 1 h and upon filtration and slow evaporation black crystals of **1** were obtained in 30 % yield after 5 days.

**Table S11: Selected bond lengths (Å) and angles (°) for 1.**

|               |          |                  |           |                     |            |                      |            |
|---------------|----------|------------------|-----------|---------------------|------------|----------------------|------------|
| Mn(1)-O(4)    | 1.877(4) | Mn(101)-O(104)   | 1.886(4)  | O(4)-Mn(1)-O(5)     | 176.60(18) | O(29)#1-Mn(2)-O(44)  | 166.99(16) |
| Mn(1)-O(5)    | 1.855(4) | Mn(101)-O(105)   | 1.890(4)  | O(4)-Mn(1)-O(38)    | 91.48(17)  | O(4)-Mn(2)-O(44)     | 88.70(17)  |
| Mn(1)-N(13)   | 1.995(5) | Mn(101)-N(113)   | 2.002(6)  | O(5)-Mn(1)-O(38)    | 90.09(18)  | O(14)-Mn(2)-O(44)    | 93.83(19)  |
| Mn(1)-O(38)   | 1.922(4) | Mn(101)-O(138)   | 1.925(4)  | N(13)-Mn(1)-O(38)   | 176.23(19) | O(17)-Mn(2)-O(44)    | 94.52(18)  |
| Mn(1)-O(41)   | 2.215(4) | Mn(101)-O(141)   | 2.240(5)  | O(4)-Mn(1)-O(41)    | 89.63(16)  | N(25)-Mn(2)-O(44)    | 87.91(18)  |
| Mn(1)-O(47)   | 2.336(5) | Mn(101)-O(147)   | 2.258(5)  | O(5)-Mn(1)-O(41)    | 93.29(18)  | O(26)#1-Mn(3)-O(4)   | 84.86(15)  |
| Mn(2)-O(29)#1 | 2.444(4) | Mn(102)-O(129)#2 | 2.412(4)  | N(13)-Mn(1)-O(41)   | 90.19(19)  | O(26)#1-Mn(3)-O(26)  | 85.61(15)  |
| Mn(2)-O(4)    | 1.893(4) | Mn(102)-Mn(103)  | 3.2545(1) | O(38)-Mn(1)-O(41)   | 93.50(17)  | O(4)-Mn(3)-O(26)     | 89.84(17)  |
| Mn(2)-O(14)   | 1.898(4) | Mn(102)-O(104)   | 1.890(4)  | O(4)-Mn(1)-O(47)    | 89.09(17)  | O(26)#1-Mn(3)-O(29)  | 84.81(14)  |
| Mn(2)-O(17)   | 1.854(4) | Mn(102)-O(114)   | 1.901(4)  | O(5)-Mn(1)-O(47)    | 87.75(18)  | O(4)-Mn(3)-O(29)     | 169.60(16) |
| Mn(2)-N(25)   | 1.979(5) | Mn(102)-O(117)   | 1.864(4)  | N(13)-Mn(1)-O(47)   | 80.87(19)  | O(26)-Mn(3)-O(29)    | 90.56(16)  |
| Mn(2)-O(44)   | 2.241(4) | Mn(102)-N(125)   | 1.989(5)  | O(38)-Mn(1)-O(47)   | 95.45(17)  | O(26)#1-Mn(3)-N(37)  | 84.89(16)  |
| Mn(3)-O(26)   | 2.453(4) | Mn(102)-O(144)   | 2.242(6)  | O(41)-Mn(1)-O(47)   | 170.99(18) | O(4)-Mn(3)-N(37)     | 88.87(18)  |
| Mn(3)-O(4)    | 1.867(4) | Mn(103)-O(126)#2 | 2.459(4)  | O(29)#1-Mn(2)-O(4)  | 86.75(14)  | O(26)-Mn(3)-N(37)    | 170.49(17) |
| Mn(3)-O(26)   | 1.944(4) | Mn(103)-O(104)   | 1.865(4)  | O(29)#1-Mn(2)-O(14) | 98.54(16)  | O(26)#1-Mn(3)-O(208) | 174.92(16) |
| Mn(3)-O(29)   | 1.915(4) | Mn(103)-O(126)   | 1.966(4)  | O(4)-Mn(2)-O(14)    | 92.63(17)  | O(4)-Mn(3)-O(208)    | 100.10(17) |
| Mn(3)-N(37)   | 2.025(5) | Mn(103)-O(129)   | 1.902(4)  | O(29)#1-Mn(2)-O(17) | 89.40(16)  | O(26)-Mn(3)-O(208)   | 95.43(17)  |
| Mn(3)-O(208)  | 2.090(4) | Mn(103)-N(137)   | 1.986(5)  | O(4)-Mn(2)-O(17)    | 175.38(17) | O(29)-Mn(3)-N(37)    | 89.03(18)  |
|               |          | Mn(103)-O(211)   | 2.109(4)  | O(14)-Mn(2)-O(17)   | 90.45(18)  | O(29)-Mn(3)-O(208)   | 90.20(17)  |
|               |          |                  |           | O(29)#1-Mn(2)-N(25) | 79.78(16)  | N(37)-Mn(3)-O(208)   | 94.07(18)  |
|               |          |                  |           | O(4)-Mn(2)-N(25)    | 88.33(18)  | Mn(2)-O(4)-Mn(1)     | 118.49(19) |
|               |          |                  |           | O(14)-Mn(2)-N(25)   | 178.03(19) | Mn(2)-O(4)-Mn(3)     | 120.9(2)   |
|               |          |                  |           | O(17)-Mn(2)-N(25)   | 88.49(19)  | Mn(1)-O(4)-Mn(3)     | 120.0(2)   |

**Table SI2: Selected bond lengths (Å) and angles (°) for 2.**

|                |            |                         |           |                   |           |
|----------------|------------|-------------------------|-----------|-------------------|-----------|
| Mn(1)-O(28) #1 | 2.4067(18) | O(28) #1-Mn(1)-O(29) #1 | 83.46(7)  | N(27)-Mn(2)-O(29) | 80.83(7)  |
| Mn(1)-O(29) #1 | 1.9090(17) | O(28) #1-Mn(1)-O(4)     | 84.68(7)  | O(4)-Mn(2)-O(45)  | 87.98(7)  |
| Mn(1)-O(4)     | 1.8676(17) | O(29) #1-Mn(1)-O(4)     | 167.75(8) | O(16)-Mn(2)-O(45) | 93.36(8)  |
| Mn(1)-O(28)    | 1.9534(17) | O(28) #1-Mn(1)-O(28)    | 85.20(7)  | O(17)-Mn(2)-O(45) | 90.99(8)  |
| Mn(1)-N(39)    | 2.009(2)   | O(29) #1-Mn(1)-O(28)    | 91.78(7)  | N(27)-Mn(2)-O(45) | 88.99(8)  |
| Mn(1)-O(41)    | 2.0877(19) | O(4)-Mn(1)-O(28)        | 90.24(7)  | O(29)-Mn(2)-O(45) | 169.44(7) |
| Mn(2)-O(4)     | 1.8956(17) | O(28) #1-Mn(1)-N(39)    | 88.07(8)  | O(4)-Mn(3)-O(5)   | 174.91(9) |
| Mn(2)-O(16)    | 1.9129(18) | O(29) #1-Mn(1)-N(39)    | 88.07(8)  | O(4)-Mn(3)-N(15)  | 88.44(8)  |
| Mn(2)-O(17)    | 1.8728(17) | O(4)-Mn(1)-N(39)        | 88.52(8)  | O(5)-Mn(3)-N(15)  | 88.38(8)  |
| Mn(2)-N(27)    | 1.986(2)   | O(28)-Mn(1)-N(39)       | 173.25(9) | O(4)-Mn(3)-O(40)  | 91.59(7)  |
| Mn(2)-O(29)    | 2.3483(17) | O(28) #1-Mn(1)-O(41)    | 174.80(7) | O(5)-Mn(3)-O(40)  | 91.11(7)  |
| Mn(2)-O(45)    | 2.218(2)   | O(29) #1-Mn(1)-O(41)    | 91.89(7)  | N(15)-Mn(3)-O(40) | 173.29(9) |
| Mn(3)-O(4)     | 1.8688(17) | O(4)-Mn(1)-O(41)        | 100.08(7) | O(4)-Mn(3)-O(51)  | 85.44(8)  |
| Mn(3)-O(5)     | 1.8770(18) | O(28)-Mn(1)-O(41)       | 92.64(7)  | O(5)-Mn(3)-O(51)  | 90.08(10) |
| Mn(3)-N(15)    | 2.004(2)   | N(39)-Mn(1)-O(41)       | 94.12(8)  | N(15)-Mn(3)-O(51) | 79.72(9)  |
| Mn(3)-O(40)    | 1.9222(19) | O(4)-Mn(2)-O(16)        | 91.06(7)  | O(4)-Mn(3)-O(48)  | 93.29(8)  |
| Mn(3)-O(51)    | 2.382(3)   | O(4)-Mn(2)-O(17)        | 176.14(8) | O(5)-Mn(3)-O(48)  | 90.86(9)  |
| Mn(3)-O(48)    | 2.204(2)   | O(16)-Mn(2)-O(17)       | 92.72(8)  | N(15)-Mn(3)-O(48) | 93.36(8)  |
|                |            | O(4)-Mn(2)-N(27)        | 88.28(8)  | O(40)-Mn(3)-O(51) | 93.59(9)  |
|                |            | O(16)-Mn(2)-N(27)       | 177.54(9) | O(40)-Mn(3)-O(48) | 93.34(8)  |
|                |            | O(17)-Mn(2)-N(27)       | 87.98(8)  | O(51)-Mn(3)-O(48) | 172.99(9) |
|                |            | O(4)-Mn(2)-O(29)        | 88.91(7)  | Mn(2)-O(4)-Mn(3)  | 119.67(9) |
|                |            | O(16)-Mn(2)-O(29)       | 96.79(7)  | Mn(2)-O(4)-Mn(1)  | 119.77(8) |
|                |            | O(17)-Mn(2)-O(29)       | 91.43(7)  | Mn(3)-O(4)-Mn(1)  | 120.29(9) |
